# Supplementary material
Source: PubMed Central journal article supplement (PMC1283780)
Supplement: plntphys_pp.105.070813_1.pdf [file plntphys_pp.105.070813_1.pdf]

## Supplementary figure legends

**Supplementary Figure 1.** Isolation and identification of maize LFNR isoenzymes. (A) Stroma and (B) thylakoid membrane fractions from maize chloroplasts were bound to a Fd-sepharose column (see methods) and eluted over a linear salt gradient. Eluting fractions were separated by SDS-PAGE and visualized by silver staining. Putative LFNR bands A, B and C were cut from the gel and identified as LFNR2, LFNR3 and LFNR1 respectively by MALDI-TOFMS and protein sequencing. Actual peptide masses and N-terminal sequences are given in the Supplementary Table

**Supplementary Figure 2.** Recombinant expression and purification of LFNR2 and LFNR3. Recombinant LFNR isoenzymes purified from *E. coli* cells were separated by SDS-PAGE and stained with Coomassie Brilliant Blue.
