# Supplementary material
Source: PubMed Central journal article supplement (PMC1283780)
Supplement: plntphys_pp.105.070813_2.pdf [file plntphys_pp.105.070813_2.pdf]

**Supplementary Table. Identification of putative LFNR proteins.**

| Band         | N-terminal | Peptide |          | Molecular species        |
|--------------|------------|---------|----------|--------------------------|
|              |            | mass    | Position |                          |
| A - Stroma   | VSTTETAEA  | 1059.6  | 255-262  | LFNR2 (AB035645)         |
|              |            | 1123.5  | 291-299  |                          |
|              |            | 1251.6  | 291-300  |                          |
|              |            | 1274.7  | 279-290  |                          |
|              |            | 1314.6  | 129-139  |                          |
|              |            | 1364.6  | 264-274  |                          |
|              |            | 1374.5  | 183-192  |                          |
|              |            | 1433.7  | 244-254  |                          |
|              |            | 1520.8  | 116-128  |                          |
|              |            | 1900    | 91-108   |                          |
|              |            | 2620.5  | 159-182  |                          |
|              |            | 2696.3  | 220-243  |                          |
| A- thylakoid | VSTTETAEA  | 1059.6  | 255-262  | LFNR2 (AB035645)         |
|              |            | 1123.5  | 291-299  |                          |
|              |            | 1251.6  | 291-300  |                          |
|              |            | 1314.6  | 129-139  |                          |
|              |            | 1364.6  | 264-274  |                          |
|              |            | 1374.6  | 183-192  |                          |
|              |            | 1433.7  | 244-254  |                          |
|              |            | 1520.9  | 116-128  |                          |
|              |            | 1900    | 91-108   |                          |
|              |            | 2258.2  | 193-212  |                          |
|              |            | 2620.5  | 159-182  |                          |
|              |            | 2696.4  | 220-243  |                          |
| B            | QVSTTETAAA | 1155.5  | 288-296  | LFNR3 (newly identified) |
|              |            | 1251.6  | 301-310  |                          |
|              |            | 1273.6  | 276-287  |                          |
|              |            | 1364.6  | 261-271  |                          |
|              |            | 1534.9  | 113-125  |                          |
|              |            | 1900.1  | 88-105   |                          |
|              |            | 2502.4  | 241-259  |                          |
|              |            | 2606.5  | 156-179  |                          |
|              |            | 2969.4  | 217-240  |                          |
| C            | QASAVEAPAT | 1059.6  | 253-260  | LFNR1 (AB035644)         |
|              |            | 1158.6  | 289-297  |                          |
|              |            | 1265.7  | 302-311  |                          |
|              |            | 1492    | 114-126  |                          |
|              |            | 1917.2  | 65-82    |                          |
|              |            | 2178.2  | 45-64    |                          |
|              |            | 2199.3  | 191-210  |                          |
| 2620.7       | 157-180    |         |          |                          |

Thylakoid and stromal Fd-binding proteins from maize leaves were separated by SDS-PAGE. Putative LFNR bands were excised and subjected to N-terminal sequencing and MALDI-TOF MS. LFNR2 peptides uniquely detected in stromal or thylakoid enzymes are shown as white on black
